# Supplementary material for: Improved H-adsorption ability and conductivity of a Co-doped Mo2N cocatalyst for efficient photocatalytic H2 generation of g-C3N4
Source: Royal Society of Chemistry journal article supplement (doi:10.1039/d2nj05003j), 2022-11-15
Supplement: d2nj05003j1.pdf [file d2nj05003j1.pdf]

## Supporting Information

### Improved H-adsorption ability and conductivity of Co-doped Mo<sub>2</sub>N cocatalyst for efficient photocatalytic H<sub>2</sub> generation of g-C<sub>3</sub>N<sub>4</sub>

Zhongxi Lu <sup>a1</sup>, Xudong He <sup>a1</sup>, Cheng Jin <sup>a</sup>, Haopeng Jiang <sup>a</sup>, Xiaohui Yu <sup>a,\*</sup>, Lijuan Sun <sup>a</sup>, Weikang Wang <sup>a</sup>, Lele Wang <sup>a</sup>, Qinqin Liu <sup>a,\*</sup>

<sup>a</sup> School of Materials Science & Engineering, Jiangsu University, Zhenjiang 212013, China

\*Corresponding Authors

E-mail address: [yutoukiki@163.com](mailto:yutoukiki@163.com) (X. Yu)

[qqliu@ujs.edu.cn](mailto:qqliu@ujs.edu.cn)

(Q.

Liu)

## **S1 Experimental**

### **S1.1 Preparation of g-C<sub>3</sub>N<sub>4</sub> nanosheets**

Mesoporous g-C<sub>3</sub>N<sub>4</sub> nanosheets were synthesized by a calcination method. Usually, 5 g of urea is placed in an aluminum oxide boat with a lid and tightly wrapped around the boat with aluminum foil to achieve a seal. Mesoporous g-C<sub>3</sub>N<sub>4</sub> nanosheets were prepared by calcining the porcelain boat in a tube furnace at 550 °C for 4 h with a heating rate of 10 °C/min in argon atmosphere.

### **S1.2 Preparation of MoO<sub>3-x</sub> olive-like nanosheets**

MoO<sub>3-x</sub> olive-like nanosheets were synthesized by a hydrothermal method. First, 2 mmol of commercial molybdenum powder was dissolved in 24 mL of n-butanol, to which 3 mL of H<sub>2</sub>O<sub>2</sub> (30 wt%) was added dropwise and stirred at room temperature for 30 min to form a transparent yellow solution. The yellow solution was then added to a 50 mL autoclave and heated to 140 °C for 12 h. The precipitate was washed with deionized water and ethanol, and then dried in vacuum at 60 °C for 12 h to obtain MoO<sub>3-x</sub> olive-like nanosheets.

## **S2 Characterization**

The structure, composition and light absorption were investigated by the X-ray diffraction (XRD, XRD-6100, Shimadzu), X-ray photoelectron spectroscopy (XPS, Thermo Fisher Nexsa) and ultraviolet-visible diffuse reflectance spectrum (UV-vis DRS, UV-2600 spectrophotometer), respectively. The morphology was studied by the scanning electron microscope (SEM, JSM-7001F) and transmission electron microscope (TEM, JEM-2100). The photoluminescence (PL) spectrum was obtained by fluorescence spectrophotometer (Hitachi, F-7000).

### S3 Photocatalytic experiments

10 mg catalysts were dispersed in an 80 ml three-necked reactor containing 10 % triethanolamine solution and then purged with N<sub>2</sub> to eliminate air. The reaction system was placed under the irradiation of a LED lamp equipped with a cutoff filter ( $\lambda = 420$  nm) as the source for testing H<sub>2</sub> evolution. The H<sub>2</sub> production was checked by a gas chromatograph (GC-2014, Japan). The apparent quantum yield (AQY) was investigated. 10 mg catalysts were dispersed in an 80 ml three-necked reactor containing 10 % triethanolamine solution and then purged with N<sub>2</sub> to eliminate air. The reaction system was placed under the irradiation of a Xe lamp equipped with a band-pass filter cutoff filter ( $\lambda = 420$  and 550 nm) as the source. The light intensity was 47251.6 and 39553.6 uW, respectively. The illumination area was 6 cm<sup>2</sup>.

The AQY calculated by the following equation

$$AQY (\%) = \frac{2 \times \text{amount of } H_2 \text{ molecules evolved in unit time}}{\text{number of incident photons in unit time}} \times 100\%$$

$\lambda = 420$  nm:

$$E = \frac{hc}{\lambda}, E_{total} = ISt, N = \frac{E_{total}}{E},$$
$$N_{total} = \sum_{k=N_{\lambda 1}}^{N_{\lambda x}} (N_{\lambda 1} + N_{\lambda 2} + \dots + N_{\lambda x}) = (N_{405} + N_{406} + \dots + N_{435}) =$$

$$N_{produce/s} = N_{total} \times S_{light\ source} = 7.802 \times 10^{16} \times 6 = 4.681 \times 10^{17}$$

$$N_{consume/s} = \frac{H_{H_2} \times M \times N_A \times 2}{T} = \frac{367.8 \times 10^{-6} \times 10 \times 10^{-3} \times 6.02 \times 10^{23}}{3600} = 1.23 \times 10^{15}$$

$$AQY = \frac{N_{consume/s}}{N_{produce/s}} \times 100\% = \frac{1.23 \times 10^{15}}{4.681 \times 10^{17}} \times 100\% = 0.26\%$$

$\lambda = 550\text{ nm}$ :

$$E = \frac{hc}{\lambda}, E_{total} = ISt, N = \frac{E_{total}}{E},$$

$$N_{total} = \sum_{k=N_{\lambda 1}}^{N_{\lambda x}} (N_{\lambda 1} + N_{\lambda 2} + \dots + N_{\lambda x}) = (N_{535} + N_{536} + \dots + N_{565}) = 4.93391$$

$\times 10^{16}$

$$N_{produce/s} = N_{total} \times S_{light\ source} = 4.93391 \times 10^{16} \times 6 = 2.96 \times 10^{17}$$

$$N_{consume/s} = \frac{H_{H_2} \times M \times N_A \times 2}{T} = \frac{9.068 \times 10^{-6} \times 10 \times 10^{-3} \times 6.02 \times 10^{23}}{3600} = 3.23 \times 10^{13}$$

$$AQY = \frac{N_{consume/s}}{N_{produce/s}} \times 100\% = \frac{3.32 \times 10^{13}}{4.681 \times 10^{17}} \times 100\% = 0.007\%$$

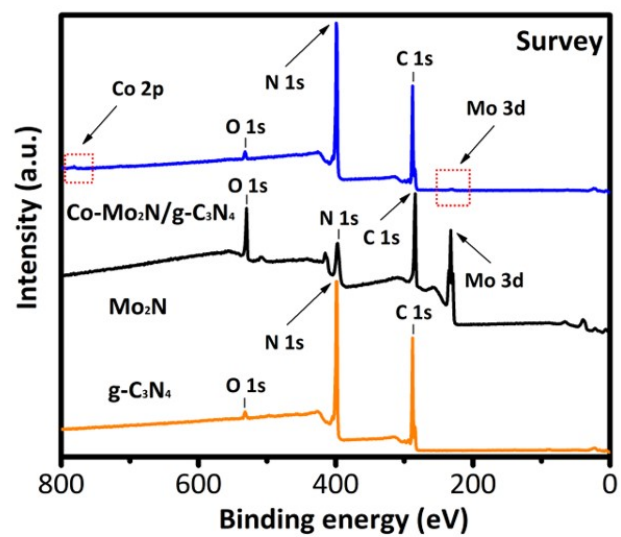

Fig. S1 Survey XPS spectra of the  $g\text{-C}_3\text{N}_4$  and  $\text{Co-Mo}_2\text{N/g-C}_3\text{N}_4$ .

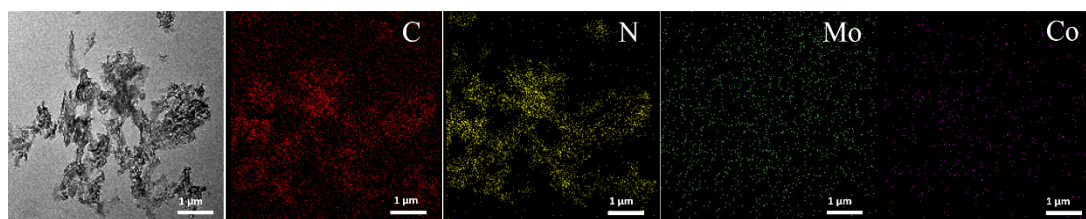

Fig. S2 TEM elemental mapping of the  $\text{Co-Mo}_2\text{N/g-C}_3\text{N}_4$ .

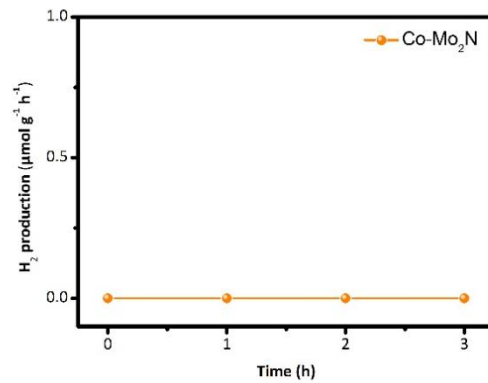

Fig. S3 H<sub>2</sub> generation of the Co-Mo<sub>2</sub>N under visible light.

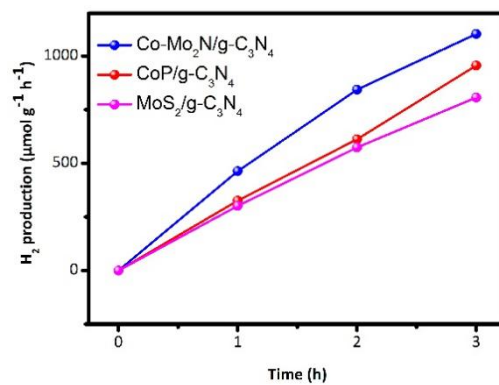

Fig. S4 H<sub>2</sub> generation of the MoP/g-C<sub>3</sub>N<sub>4</sub> and Mo<sub>2</sub>S/g-C<sub>3</sub>N<sub>4</sub> under visible light.

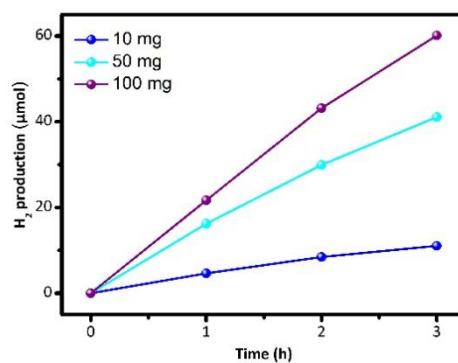

Fig. S5 H<sub>2</sub> generation by using different amount of Co-Mo<sub>2</sub>N/g-C<sub>3</sub>N<sub>4</sub> under visible light.

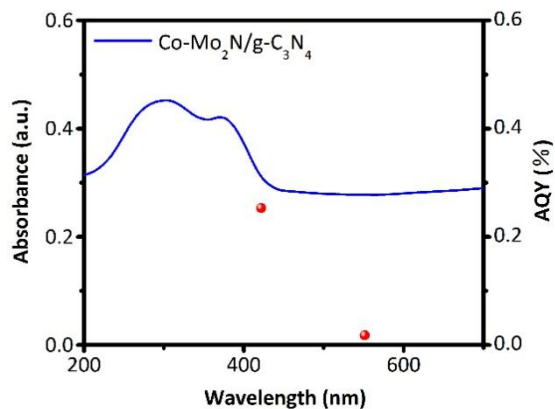

Fig. S6 AQY of the Co-Mo<sub>2</sub>N/g-C<sub>3</sub>N<sub>4</sub> under visible light.

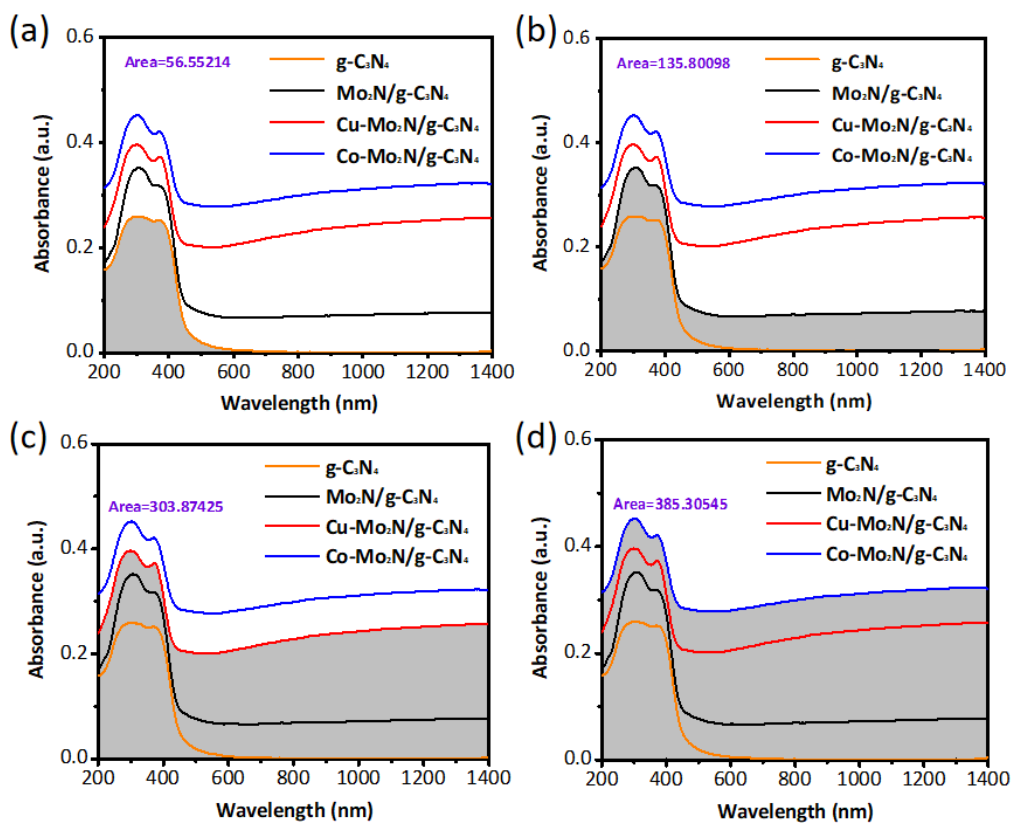

Fig. S7 UV-vis spectra of area: (a) g-C<sub>3</sub>N<sub>4</sub>, (b) Mo<sub>2</sub>N/g-C<sub>3</sub>N<sub>4</sub>, (c) Cu-Mo<sub>2</sub>N/g-C<sub>3</sub>N<sub>4</sub>, (d) Co-Mo<sub>2</sub>N/g-C<sub>3</sub>N<sub>4</sub>.

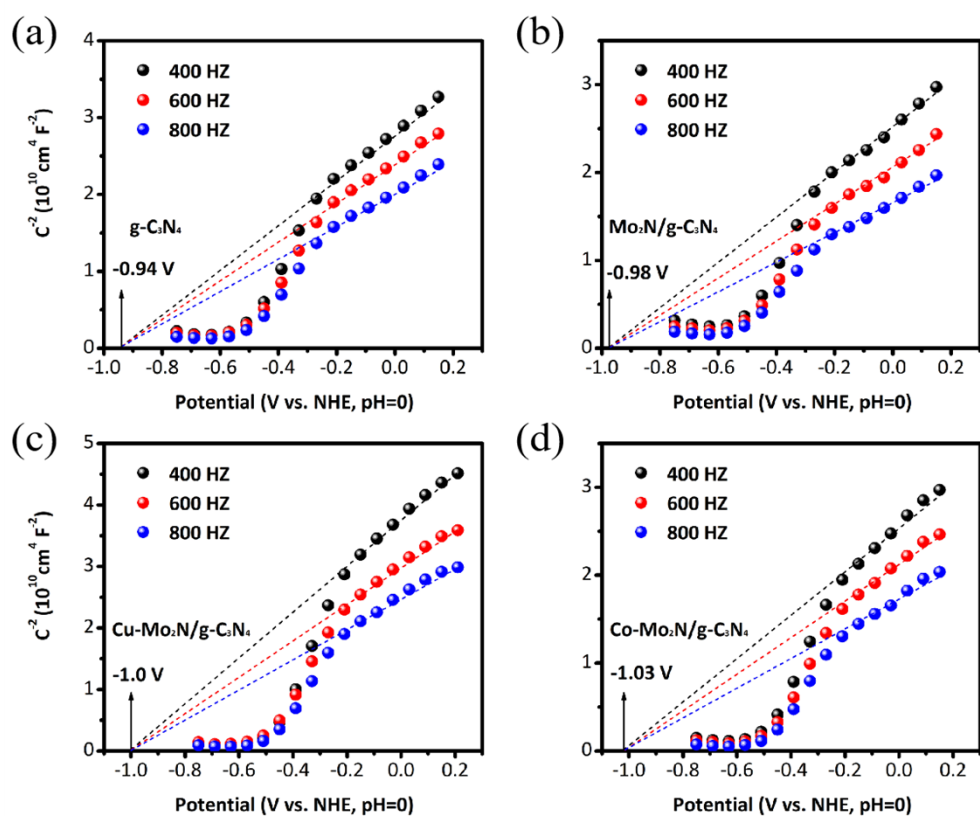

Fig. S8 M-S plots of  $g\text{-C}_3\text{N}_4$  (a),  $\text{Mo}_2\text{N}/g\text{-C}_3\text{N}_4$  (b),  $\text{Cu-Mo}_2\text{N}/g\text{-C}_3\text{N}_4$  (c) and  $\text{Co-Mo}_2\text{N}/g\text{-C}_3\text{N}_4$ .

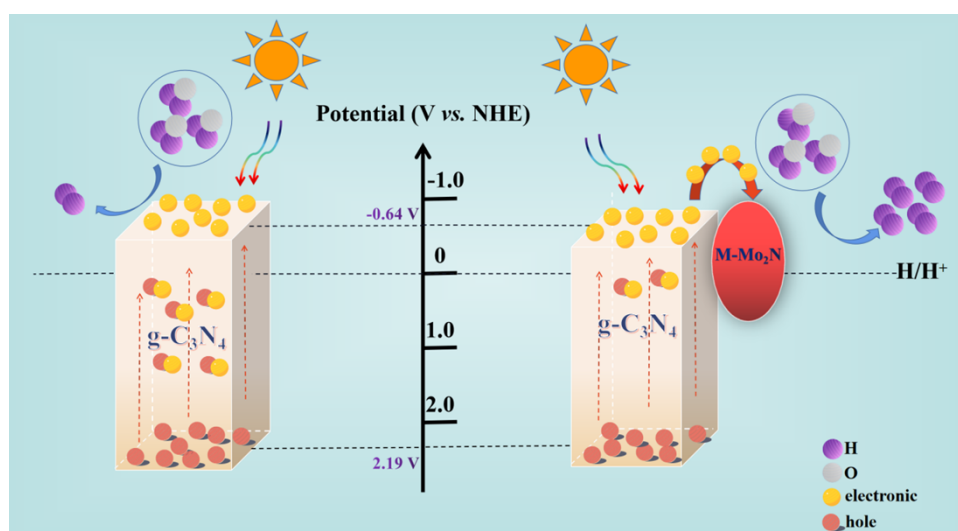

Fig. S9 Mechanism of higher  $\text{H}_2$  generation of the  $\text{Co-Mo}_2\text{N}/g\text{-C}_3\text{N}_4$ .

Table. S1 The information of the AQY measurements



| Wavelength (nm) | light area (cm <sup>2</sup> ) | Substrate (uW) |
|-----------------|-------------------------------|----------------|
| 420             | 6                             | 47251.6        |
| 550             | 6                             | 39553.6        |

Table. S2 Area and integral fraction for UV-vis spectra.

| Samples  | g-C <sub>3</sub> N <sub>4</sub> | Mo <sub>2</sub> N/g-C <sub>3</sub> N <sub>4</sub> | Cu-Mo <sub>2</sub> N/g-C <sub>3</sub> N <sub>4</sub> | Co-Mo <sub>2</sub> N/g-C <sub>3</sub> N <sub>4</sub> |
|----------|---------------------------------|---------------------------------------------------|------------------------------------------------------|------------------------------------------------------|
| Area     | 56.6                            | 135.8                                             | 303.9                                                | 385.3                                                |
| Fraction | 1                               | 2.4                                               | 5.37                                                 | 6.81                                                 |

Table. S3 Comparison of the photocatalytic H<sub>2</sub> generation over different catalysts.

| Catalysis                                                           | light source                          | substrate       | H <sub>2</sub> production<br>( $\mu\text{mol g}^{-1}\cdot\text{h}^{-1}$ ) | Ref.         |
|---------------------------------------------------------------------|---------------------------------------|-----------------|---------------------------------------------------------------------------|--------------|
| MoP/g-C <sub>3</sub> N <sub>4</sub>                                 | 80W LED<br>$\lambda=400$ nm           | 10% TEOA        | 327.5                                                                     | 1            |
| CoP/g-C <sub>3</sub> N <sub>4</sub>                                 | 300 W Xe lamp<br>$\lambda>320$ nm     | 20% TEOA        | 201.5                                                                     | 2            |
| MoO <sub>3</sub> /g-C <sub>3</sub> N <sub>4</sub>                   | 300 W Xe lamp<br>$\lambda\geq 420$ nm | 20% TEOA        | 328.75                                                                    | 3            |
| Mo <sub>2</sub> N/g-C <sub>3</sub> N <sub>4</sub>                   | 300 W Xe lamp<br>$\lambda\geq 420$ nm | 20% TEOA        | 0.89                                                                      | 4            |
| Ni <sub>3</sub> N/g-C <sub>3</sub> N <sub>4</sub>                   | 300 W Xe lamp<br>$\lambda\geq 420$ nm | 20% TEOA        | 305.4                                                                     | 5            |
| MoS <sub>2</sub> /g-C <sub>3</sub> N <sub>4</sub> /TiO <sub>2</sub> | 300 W Xe lamp<br>$\lambda>400$ nm     | 25%<br>methanol | 125                                                                       | 6            |
| Co(Mo-Mo <sub>2</sub> C)/g-C <sub>3</sub> N <sub>4</sub>            | 300W Xe lamp<br>$\lambda\geq 420$ nm  | 20% TEOA        | 11291                                                                     | 7            |
| Co-Mo <sub>2</sub> N/g-C <sub>3</sub> N <sub>4</sub>                | 80W LED<br>$\lambda=420$ nm           | 10% TEOA        | 367.8                                                                     | This<br>Work |

## References

1. W. Liu, J. Shen, Q. Liu, X. Yang and H. Tang, Porous MoP network structure as co-catalyst for H<sub>2</sub> Evolution over g-C<sub>3</sub>N<sub>4</sub> nanosheets, *Appl. Surf. Sci.*, 2018, **462**, 822-830.
2. F. Zhang, J. Wei, X. Zhang, J. Shen, X. Meng, H. Dong, D. Yang and X. Jun, ZIF-derived CoP as a cocatalyst for enhanced photocatalytic H<sub>2</sub> production activity of g-C<sub>3</sub>N<sub>4</sub>, *Sustain. Energy Fuels*, 2018, **2**, 1356-1361.
3. H. Wang, N. Guan, Z. Feng, W. Xiang, H. Zhao and X. Zhang, Constructing defect engineered 2D/2D MoO<sub>3</sub>/g-C<sub>3</sub>N<sub>4</sub> Z-scheme heterojunction for enhanced photocatalytic activity, *J. Alloys Compd.*, 2022, **926**, 166964.
4. S. Gong, Z. Jiang, P. Shi, J. Fan, Q. Xu and Y. Min, Noble-metal-free heterostructure for efficient hydrogen evolution in visible region: Molybdenum nitride/ultrathin graphitic carbon nitride, 2018, **238**, 318-327.
5. J. Ge, Y. Liu, D. Jiang, L. Zhang, P. Du, Integrating non-precious-metal cocatalyst Ni<sub>3</sub>N with g-C<sub>3</sub>N<sub>4</sub> for enhanced photocatalytic H<sub>2</sub> production in water under visible-light irradiation, *Chin. J. Catal.*, 2019, **40**, 160-167.
6. X. Yang, H. Huang, M. Kubota, Z. He, N. Kobayashi, X. Zhou, B. Jin and J. Luo, Synergetic effect of MoS<sub>2</sub> and g-C<sub>3</sub>N<sub>4</sub> as cocatalysts for enhanced photocatalytic H<sub>2</sub> production activity of TiO<sub>2</sub>, *Mater. Res. Bull.*, 2016, **76**, 79-84.
7. Y. Zheng, J. Dong, C. Huang, L. Xia, Q. Wu, Q. Xu and W. Yao, Co-doped Mo-Mo<sub>2</sub>C cocatalyst for enhanced g-C<sub>3</sub>N<sub>4</sub> photocatalytic H<sub>2</sub> evolution, *Appl. Catal. B Environ.*, 2020, **260**, 118220.
